# Supplementary material for: Interleukin-22 is increased in multiple sclerosis patients and targets astrocytes
Source: PubMed Central journal article supplement (PMC4480507; doi:10.1186/s12974-015-0335-3), 2015-06-16

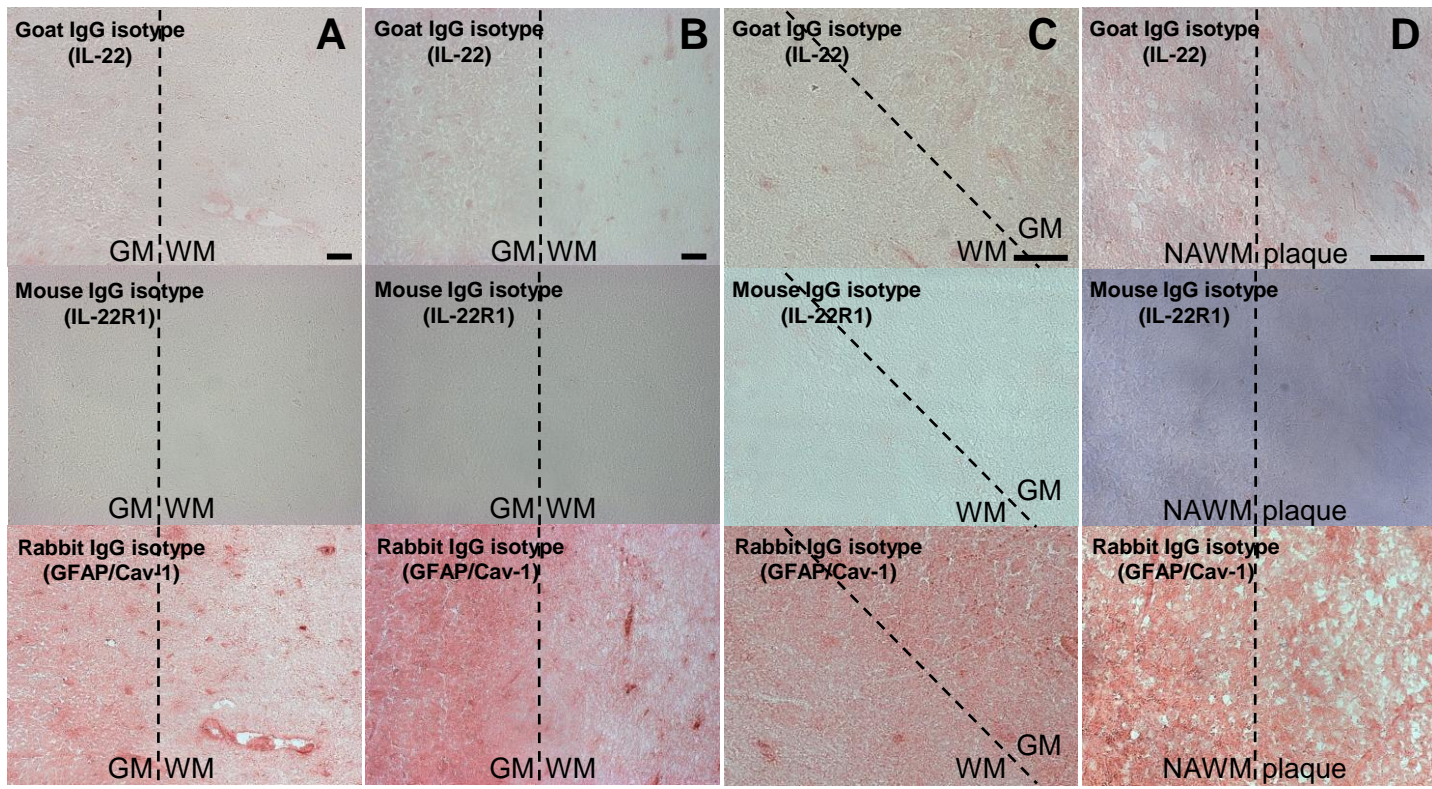

Supplement: 12974_2015_335_MOESM6_ESM.pdf [file 12974_2015_335_MOESM6_ESM.pdf]
