# Supplementary material for: Interleukin-22 is increased in multiple sclerosis patients and targets astrocytes
Source: Springer Nature journal article supplement (doi:10.1186/s12974-015-0335-3), 2015-06-16

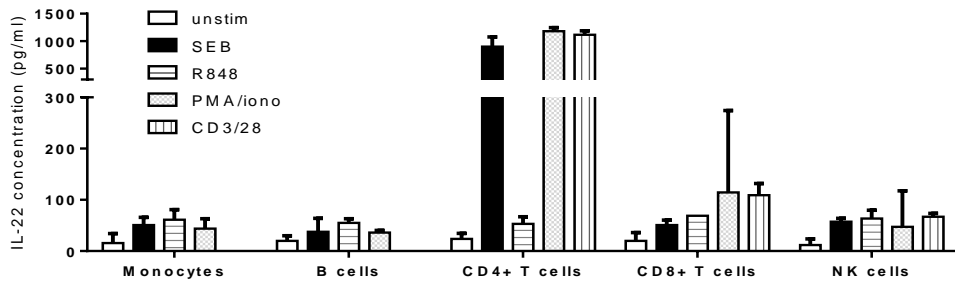

Supplement: MOESM1 [file 9768728]
